# Supplementary material for: A comparative study of honeycomb-like 2D π-conjugated metal–organic framework chemiresistors: conductivity and channels
Source: Royal Society of Chemistry journal article supplement (doi:10.1039/d1dt02323c), 2021-01-01
Supplement: d1dt02323c1.pdf [file d1dt02323c1.pdf]

## Supporting Information

### **A Comparative Study of Honeycomb-like 2D $\pi$ -Conjugation Metal-Organic Frameworks Chemiresistors: Conductivity and Channels**

Ming-Shui Yao,<sup>a</sup> Ping Wang,<sup>a</sup> Yi-Fan Gu,<sup>a</sup> Tomoyuki Koganezawa,<sup>b</sup> Hirotaka Ashitani,<sup>c</sup> Yoshiki

Kubota,<sup>c</sup> Zao-Ming Wang,<sup>a</sup> Ze-Yu Fan,<sup>a</sup> Ken-ichi Otake,<sup>\*a</sup> and Susumu Kitagawa<sup>\*a</sup>

<sup>a</sup> *Institute for Integrated Cell-Material Sciences, Kyoto University Institute for Advanced Study,  
Kyoto University, Yoshida Ushinomiya-cho, Sakyo-ku, Kyoto 606-8501, Japan. E-mail:  
ootake.kenichi.8a@kyoto-u.ac.jp, kitagawa@icems.kyoto-u.ac.jp*

<sup>b</sup> *Japan Synchrotron Radiation Research Institute (JASRI), 1-1-1, Kouto, Sayo-cho, Sayo-gun,  
Hyogo 679-5198 Japan.*

<sup>c</sup> *Department of Physical Science, Graduate School of Science, Osaka Prefecture University,  
Osaka, Japan*

E-mail: ootake.kenichi.8a@kyoto-u.ac.jp, kitagawa@icems.kyoto-u.ac.jp

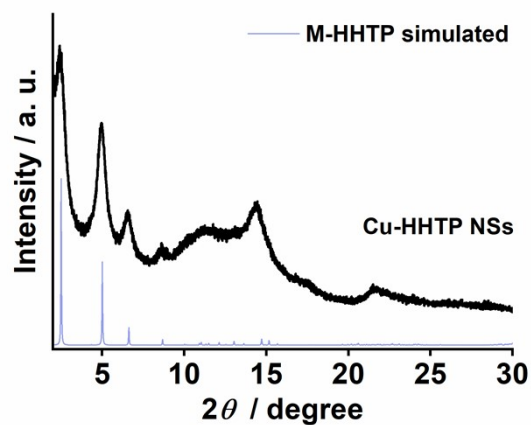

Fig.S1 The PXRD patterns of Cu-HHTP NSs powders and simulated M-HHTP, data were collected at beamline 02B2 in SPring 8, Japan ( $\lambda=0.79962$  Å).

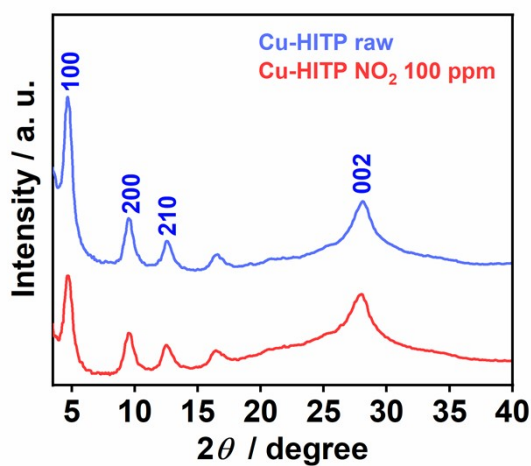

Fig.S2 PXRD patterns of Cu-HITP before and after exposure to 100 ppm of NO<sub>2</sub> gas diluted in dry air.

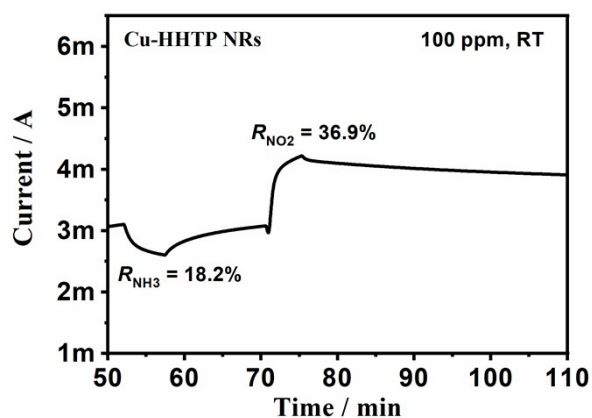

Fig.S3 The dynamic sensing curve of Cu-HHTP NRs sensor toward typical reducing gases ( $\text{NH}_3$  100 ppm) and oxidizing gas ( $\text{NO}_2$  100 ppm).

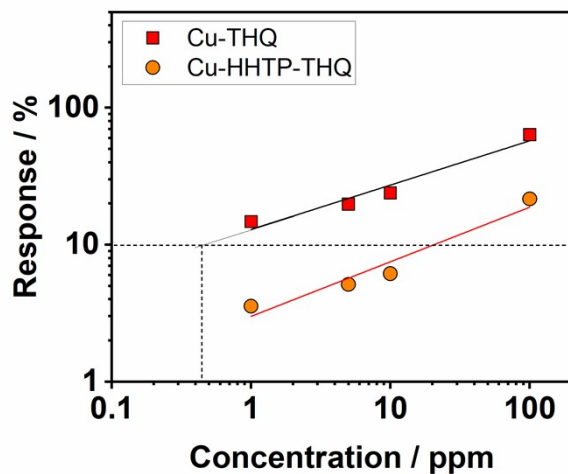

Fig. S4 The log-log plots of response vs. concentration of Cu-HHTP-THQ and Cu-THQ sensors toward 1-100 ppm of  $\text{NH}_3$ . The linear fitting equation for Cu-THQ is  $y=1.11212+0.32351x$ . By setting  $R=10\%$ , the calculated LOD value is  $\sim 0.45$  ppm.
